# Supplementary material
Source: PubMed Central journal article supplement (PMC3058354)

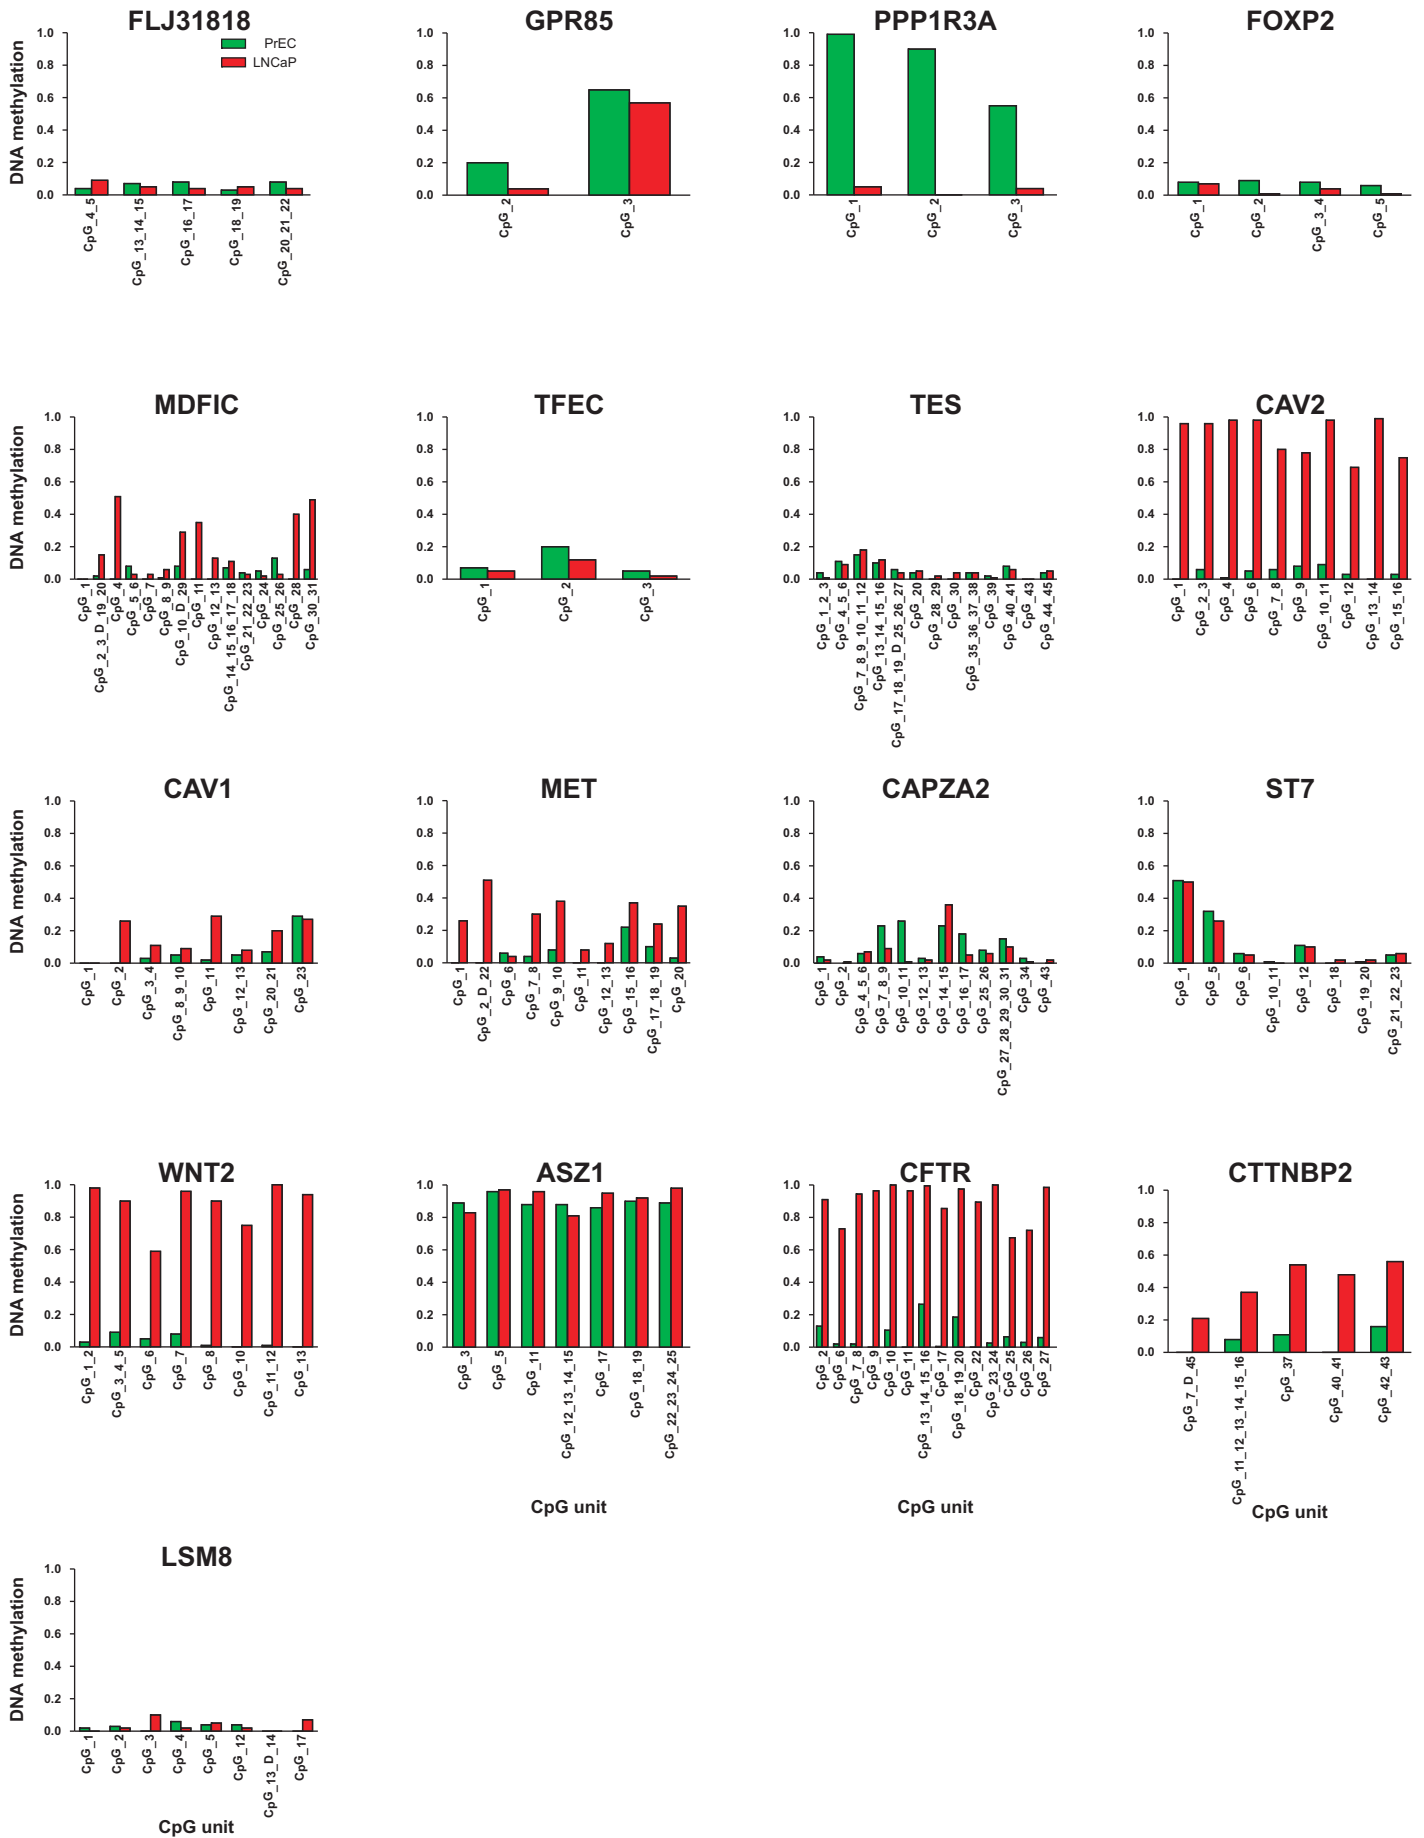

Supplement: NIHMS271203-supplement-Supp_Fig_3.pdf [file NIHMS271203-supplement-Supp_Fig_3.pdf]

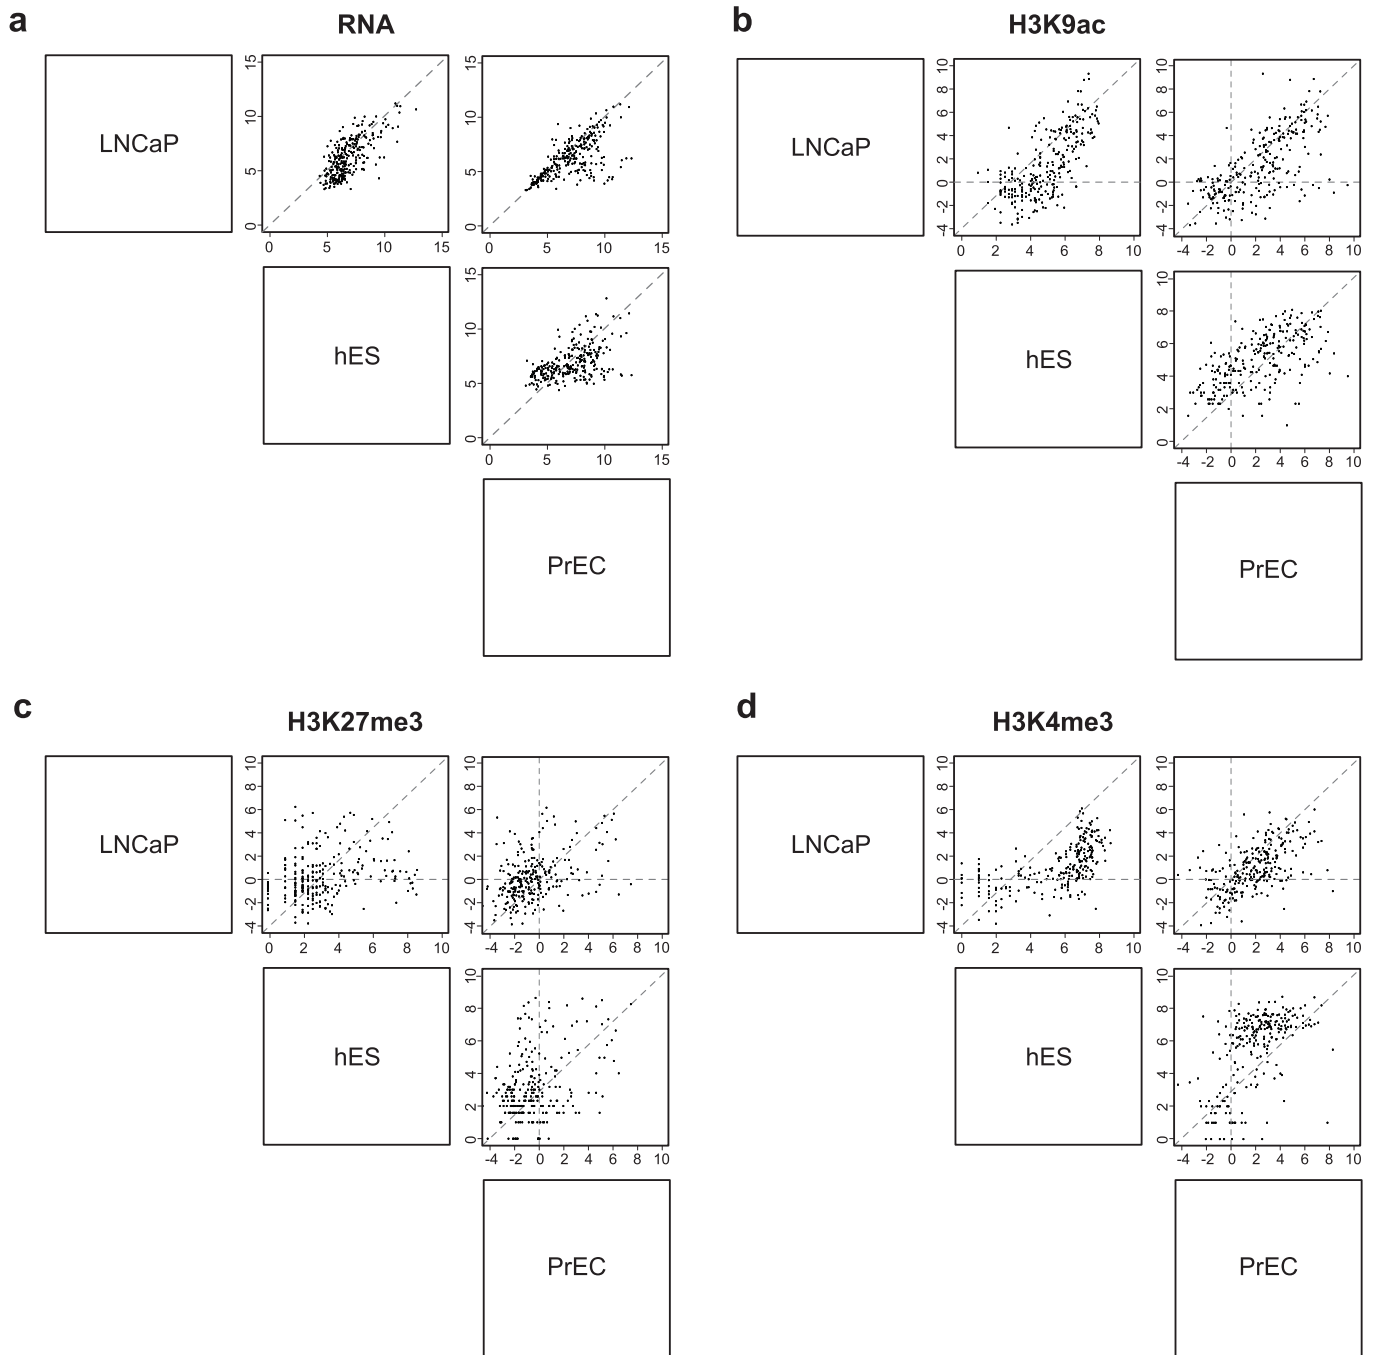

Coolen\_Supplementary\_Information\_Figure\_S5

Supplement: NIHMS271203-supplement-Supp_Fig_5.pdf [file NIHMS271203-supplement-Supp_Fig_5.pdf]

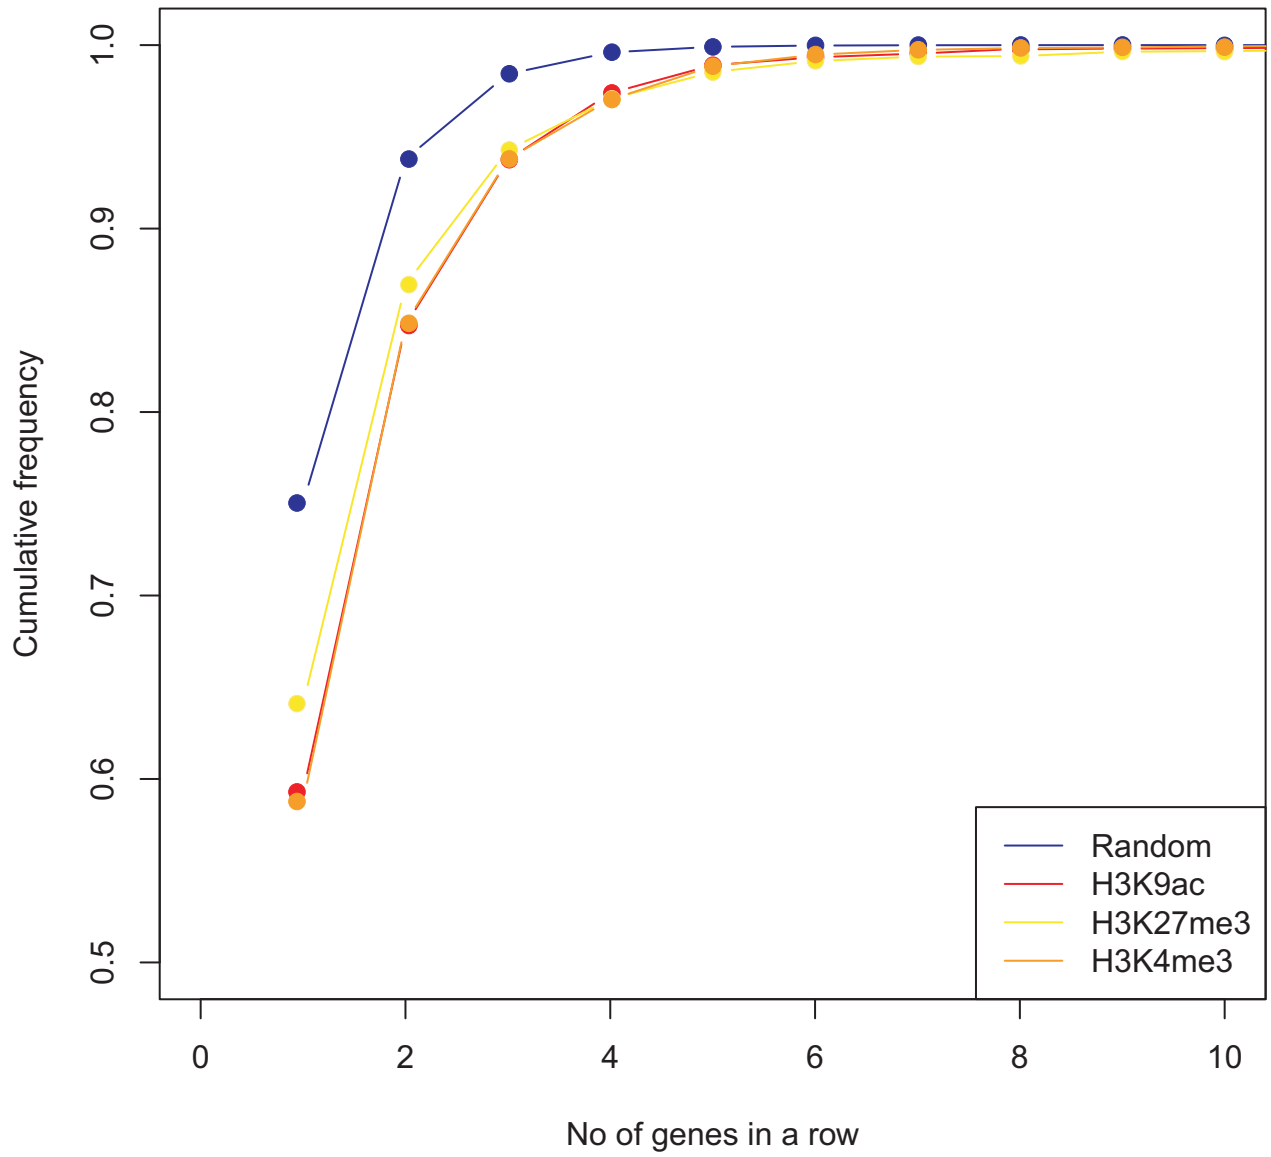

Coolen\_Supplementary\_Information\_Figure\_S6

Supplement: NIHMS271203-supplement-Supp_Fig_6.pdf [file NIHMS271203-supplement-Supp_Fig_6.pdf]
